# Supplementary material
Source: MDPI journal article supplement (https://www.mdpi.com/2073-4344/11/9/1132)
Supplement: s1 [file s1]

# Mesoporous Carbon Production by Nanocasting Technique Using Boehmite as a Template

María Ortega-Franqueza, Svetlana Ivanova, María Isabel Domínguez  
and Miguel Ángel Centeno \*

Departamento de Química Inorgánica, Instituto de Ciencia de Materiales de Sevilla, Centro Mixto CSIC–Universidad de Sevilla, Av. Américo Vespucio 49, 41092 Sevilla, Spain; ortegafrankeza@gmail.com (M.O.-F.); sivanova@us.es (S.I.); mdominguez1@us.es (M.I.D.)

\* Correspondence: centeno@icmse.csic.es; Tel.: +34-954489543

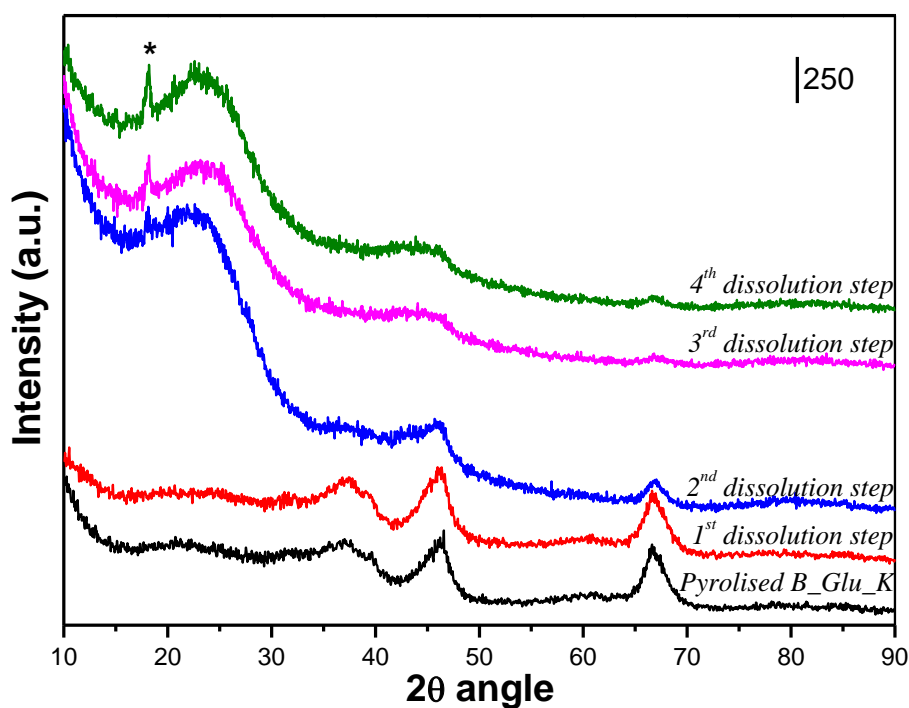

**Figure S1.** X-ray diffractograms evolution of pyrolised *B\_Glu\_K* sample after each stage of template dissolution (\* silicate).

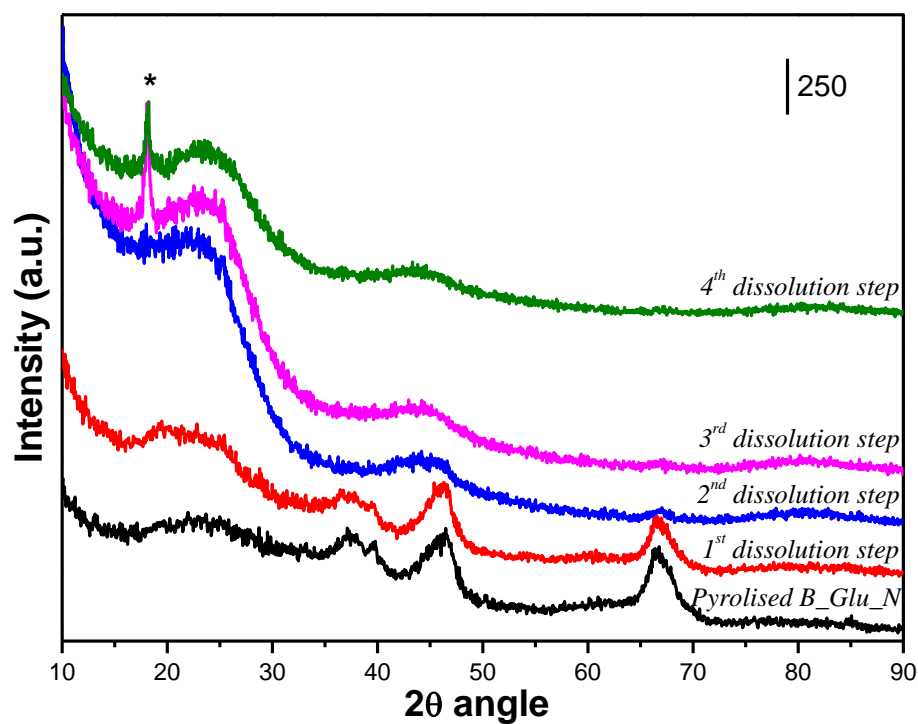

**Figure S2.** X-ray diffractograms evolution of pyrolised *B\_Glu\_N* sample after each stage of template dissolution (\* silicate).

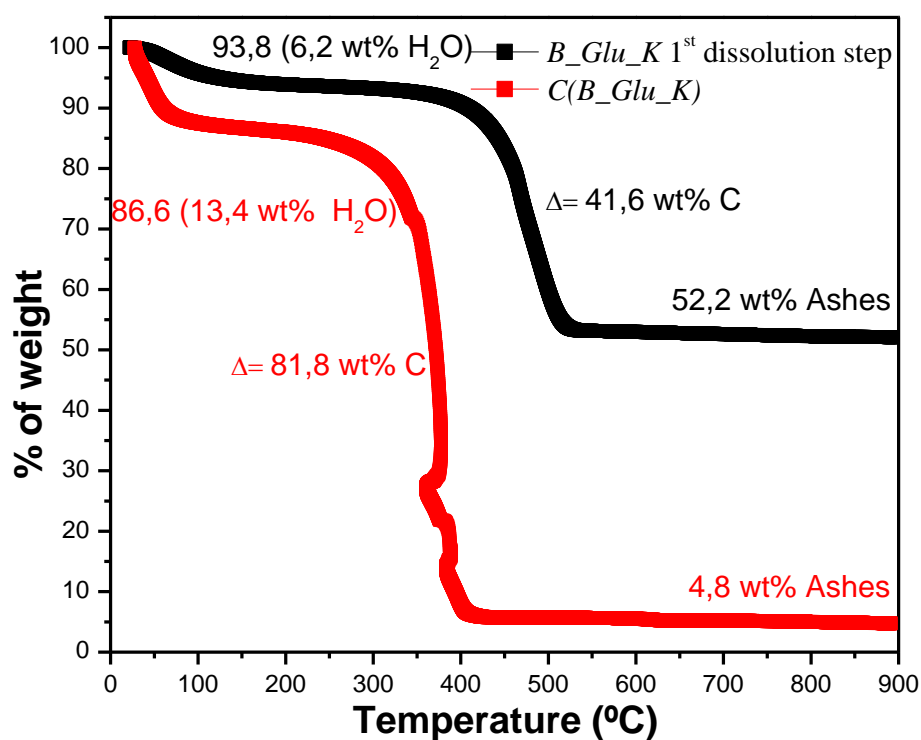

**Figure S3.** Thermal analysis for samples *B\_Glu\_K* (after the first template dissolution step) and *C(B\_Glu\_K)*.

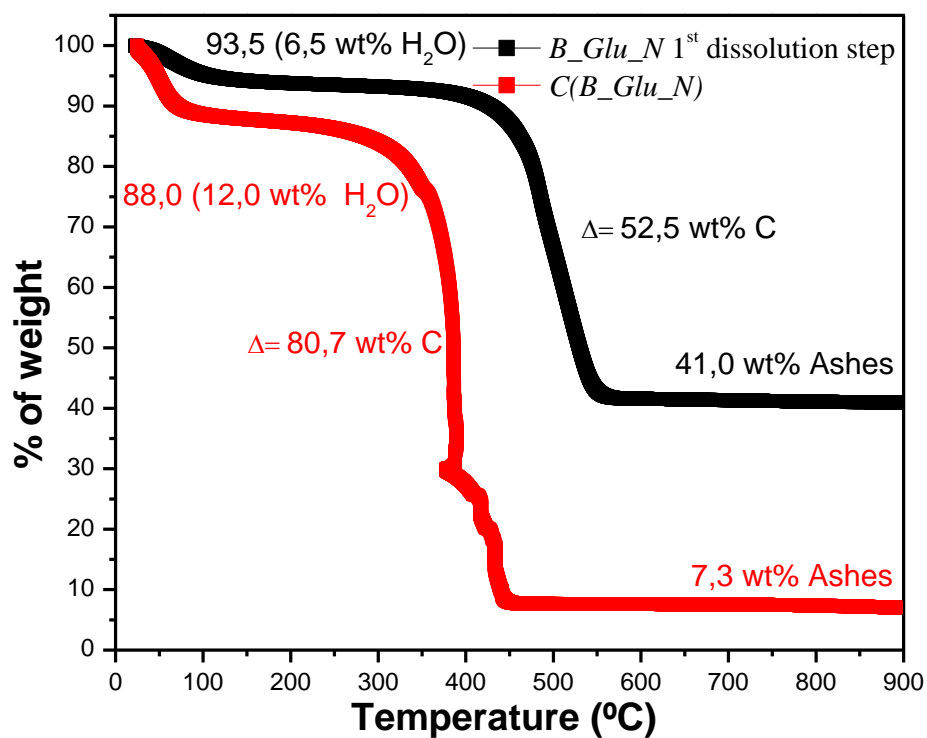

**Figure S4.** Thermal analysis for samples  $B\_Glu\_N$  (after the first template dissolution step) and  $C(B\_Glu\_N)$ .

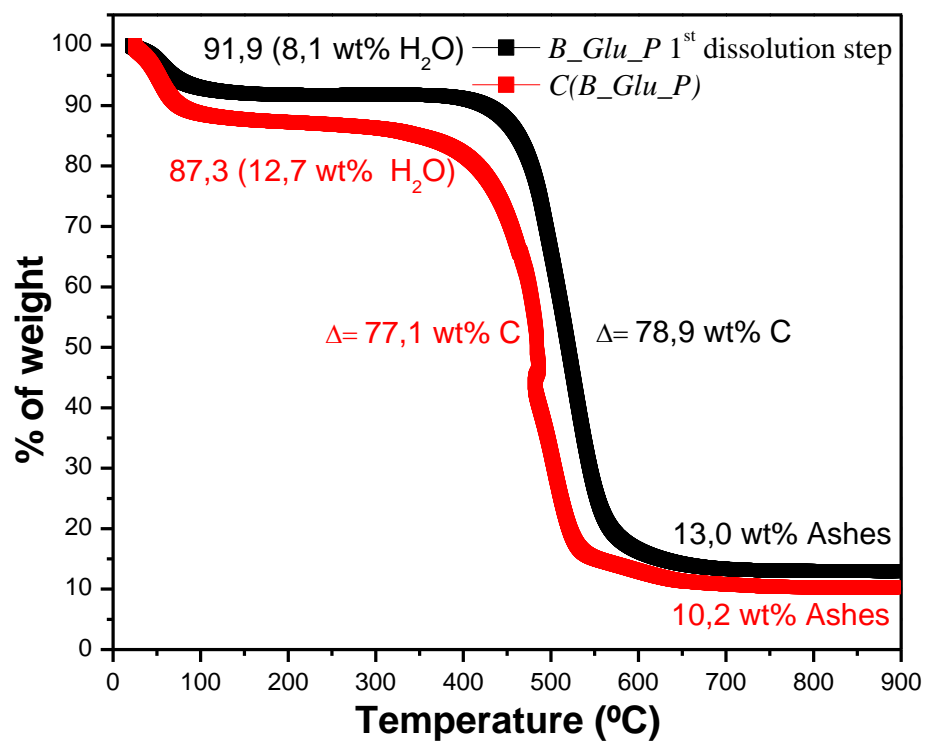

**Figure S5.** Thermal analysis for samples  $B\_Glu\_P$  (after the first template dissolution step) and  $C(B\_Glu\_P)$ .

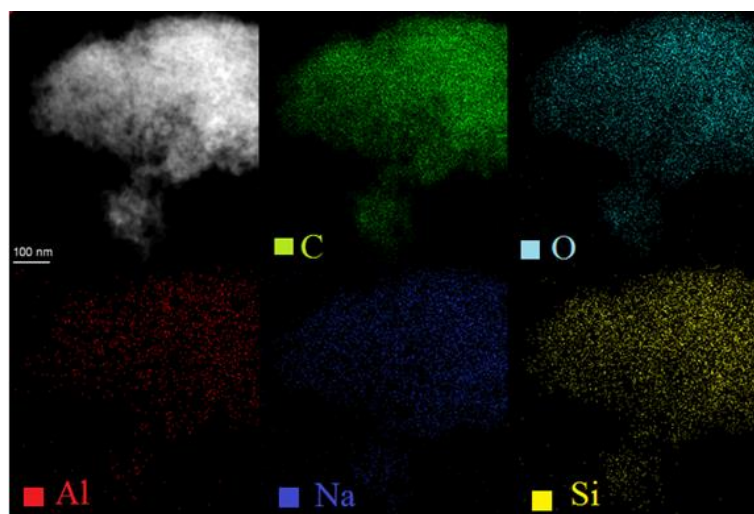

**Figure S6** Mapping for  $C(B\_Glu)$ .

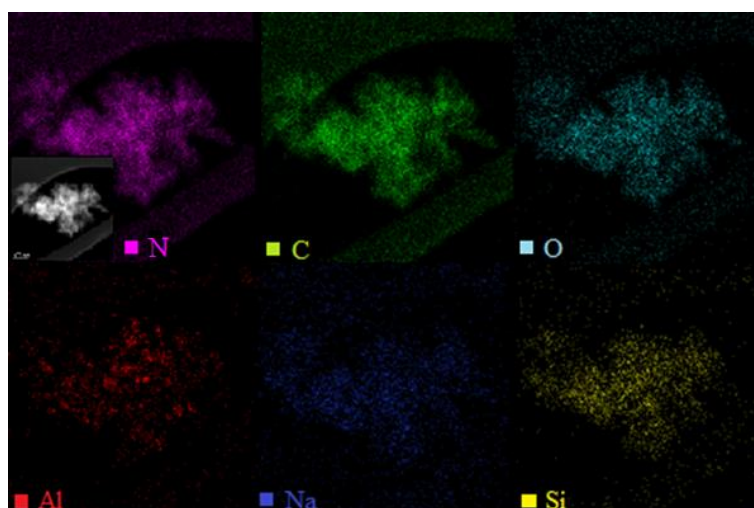

**Figure S7** Mapping for  $C(B\_Glu\_N)$ .

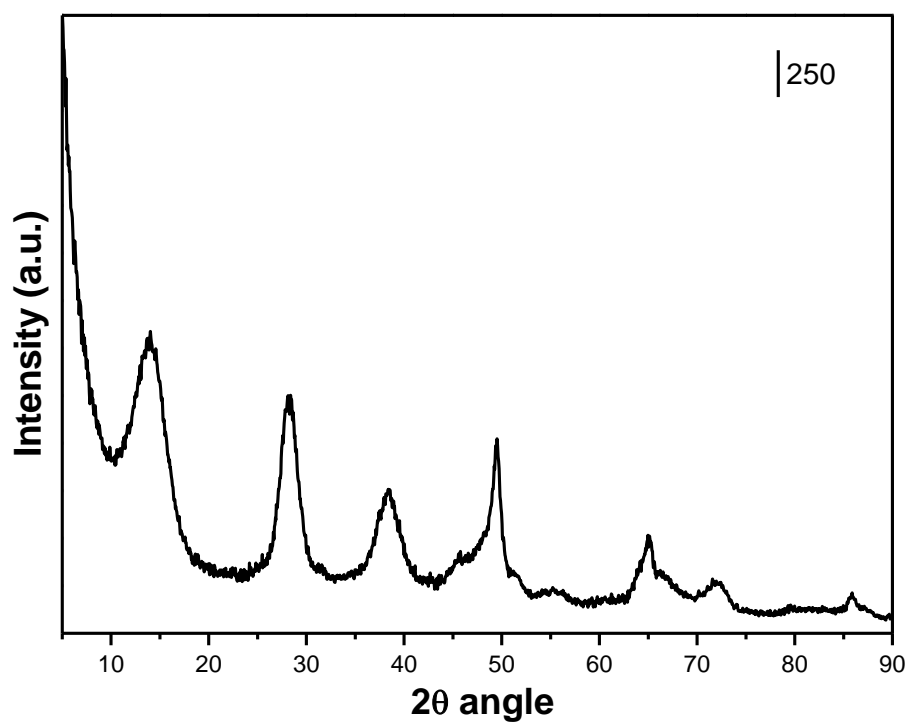

**Figure S8.** Diffractogram of the synthesised boehmite.

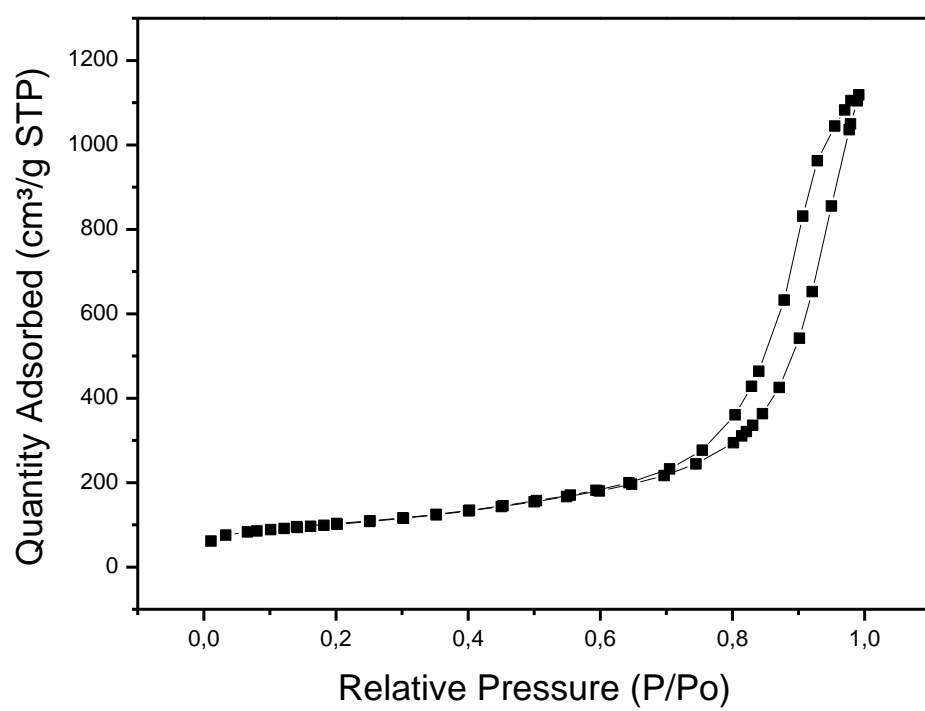

**Figure S9.** N<sub>2</sub> isotherms of the synthesised boehmite.
